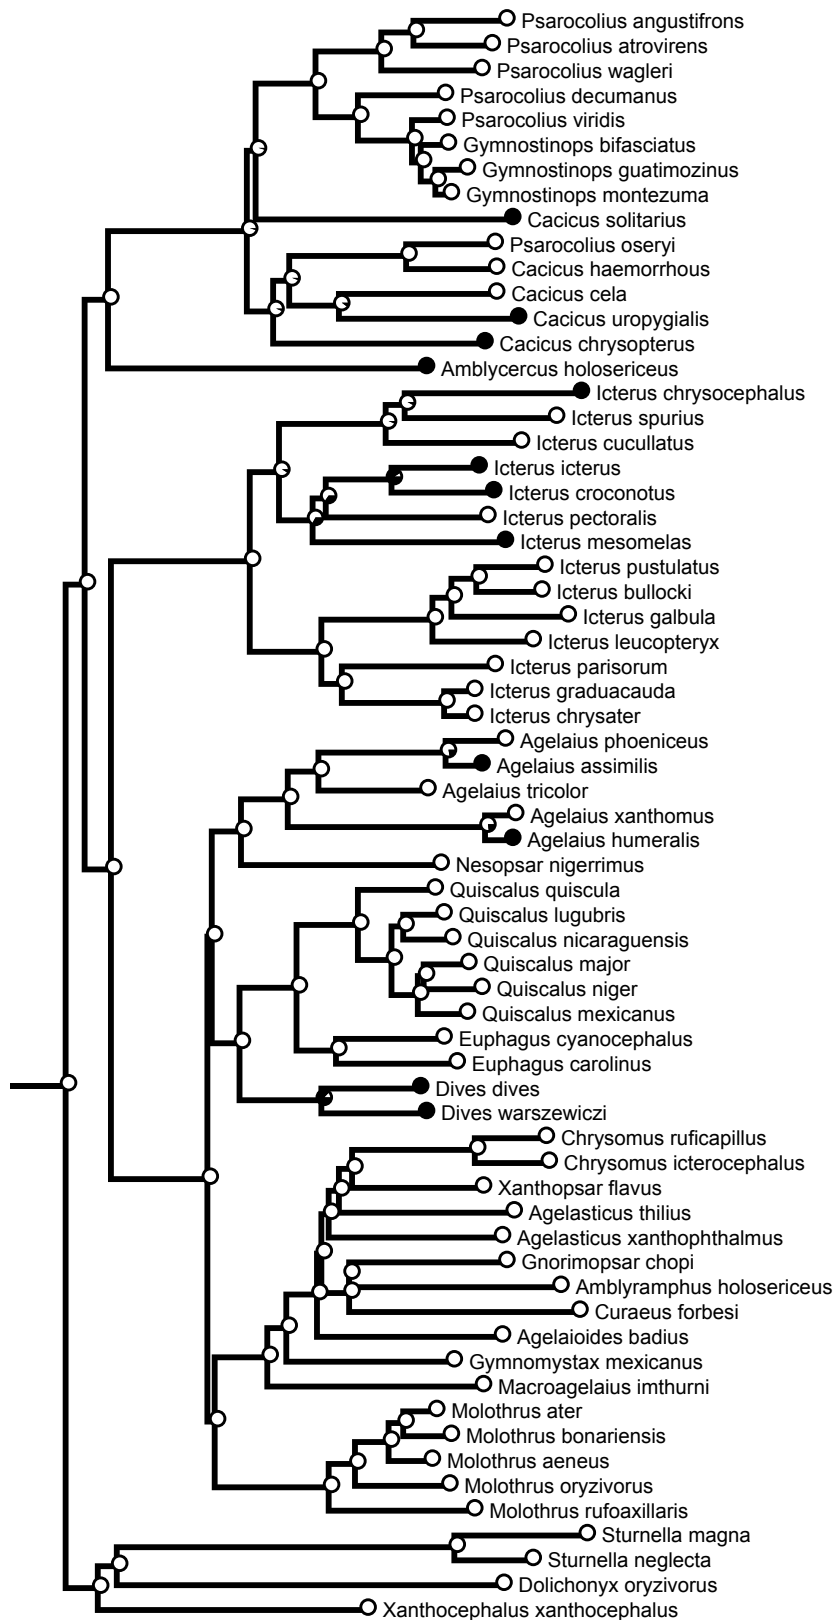

**Supplementary Figure 1:** Maximum-likelihood (Mk1) reconstruction of duetting in the New World blackbirds (Icteridae). Proportion of shading in circles represents the likelihood that duetting was present (black) or absent (white) at each node of the tree.
